# Supplementary material for: Long-term follow-up of patients undergoing renal sympathetic denervation
Source: PubMed Central journal article supplement (PMC9622524; doi:10.1007/s00392-022-02056-5), 2022-07-18

## **Supplemental material**

**Supplemental table 1.** Ambulatory and office blood pressure measurements and renal function per follow-up moment.

|                                   | <b>Baseline</b>        | <b>3 months</b>        | <b>6 months</b>        | <b>1 year</b>          | <b>2 years</b>         | <b>3 years</b>         | <b>4 years</b>         | <b>5 years</b>         |
|-----------------------------------|------------------------|------------------------|------------------------|------------------------|------------------------|------------------------|------------------------|------------------------|
| <b>Ambulatory blood pressure</b>  |                        |                        |                        |                        |                        |                        |                        |                        |
| Daytime SBP (mmHg)                | 146.1 ± 17.4<br>(n=71) | 141.3 ± 19.0<br>(n=58) | 136.3 ± 18.1<br>(n=65) | 137.6 ± 19.5<br>(n=65) | 134.6 ± 18.0<br>(n=60) | 131.2 ± 18.1<br>(n=51) | 131.2 ± 22.4<br>(n=31) | 128.5 ± 11.9<br>(n=26) |
| Daytime DBP (mmHg)                | 83.7 ± 12.2<br>(n=71)  | 81.9 ± 11.2<br>(n=58)  | 77.6 ± 8.9<br>(n=65)   | 78.8 ± 11.3<br>(n=65)  | 76.0 ± 9.3<br>(n=60)   | 74.2 ± 10.0<br>(n=51)  | 72.8 ± 10.1<br>(n=31)  | 72.2 ± 8.2<br>(n=26)   |
| Nighttime SBP (mmHg)              | 134.0 ± 17.7<br>(n=68) | 130.8 ± 20.3<br>(n=52) | 125.0 ± 20.2<br>(n=65) | 126.5 ± 19.0<br>(n=64) | 124.4 ± 17.6<br>(n=60) | 122.2 ± 18.7<br>(n=50) | 124.5 ± 25.1<br>(n=30) | 123.3 ± 15.0<br>(n=24) |
| Nighttime DBP (mmHg)              | 74.8 ± 12.7<br>(n=68)  | 73.8 ± 13.0<br>(n=52)  | 68.6 ± 10.0<br>(n=65)  | 70.2 ± 10.9<br>(n=64)  | 68.1 ± 9.4<br>(n=60)   | 66.2 ± 9.1<br>(n=50)   | 67.4 ± 11.5<br>(n=30)  | 66.0 ± 8.3<br>(n=24)   |
| Mean 24h SBP (mmHg)               | 143.2 ± 16.4<br>(n=72) | 139.2 ± 19.2<br>(n=61) | 133.2 ± 17.6<br>(n=66) | 134.5 ± 18.6<br>(n=65) | 132.7 ± 17.9<br>(n=61) | 129.7 ± 19.2<br>(n=51) | 129.7 ± 19.2<br>(n=31) | 126.7 ± 11.9<br>(n=26) |
| Mean 24h DBP (mmHg)               | 81.2 ± 11.5<br>(n=72)  | 80.0 ± 11.3<br>(n=61)  | 75.4 ± 8.8<br>(n=66)   | 76.6 ± 10.8<br>(n=65)  | 74.3 ± 9.5<br>(n=61)   | 72.0 ± 9.4<br>(n=51)   | 71.3 ± 9.8<br>(n=31)   | 70.3 ± 7.8<br>(n=26)   |
| <b>Office blood pressure</b>      |                        |                        |                        |                        |                        |                        |                        |                        |
| Office SBP (mmHg)                 | 169.2 ± 21.2<br>(n=72) | 154.5 ± 25.6<br>(n=66) | 155.0 ± 24.4<br>(n=68) | 150.9 ± 24.6<br>(n=68) | 146.0 ± 19.6<br>(n=61) | 147.6 ± 19.0<br>(n=49) | 146.1 ± 20.0<br>(n=28) | 141.5 ± 22.0<br>(n=26) |
| Office DBP (mmHg)                 | 93.0 ± 14.1<br>(n=72)  | 87.6 ± 12.6<br>(n=66)  | 84.4 ± 12.5<br>(n=68)  | 83.9 ± 12.6<br>(n=68)  | 84.2 ± 12.0<br>(n=61)  | 81.5 ± 11.8<br>(n=49)  | 81.8 ± 13.7<br>(n=28)  | 78.0 ± 13.2<br>(n=26)  |
| <b>Renal function</b>             |                        |                        |                        |                        |                        |                        |                        |                        |
| eGFR (ml/min/1.73m <sup>2</sup> ) | 71.7 ± 16.0<br>(n=72)  | 71.0 ± 16.2<br>(n=52)  | 72.2 ± 18.2<br>(n=65)  | 70.4 ± 17.6<br>(n=69)  | 68.7 ± 15.9<br>(n=64)  | 65.1 ± 17.0<br>(n=54)  | 60.2 ± 20.6<br>(n=33)  | 58.6 ± 20.7<br>(n=28)  |

*DBP: Diastolic Blood Pressure; eGFR: estimated Glomerular Filtration Rate; SBP: Systolic Blood Pressure. All values are displayed as mean ± standard deviation (number of observations).*

**Supplemental figure 1.** Model effect plot for changes in ambulatory mean 24-hour (a.) systolic and (b.) diastolic blood pressure over time.

a. Ambulatory mean 24-hour systolic blood pressure

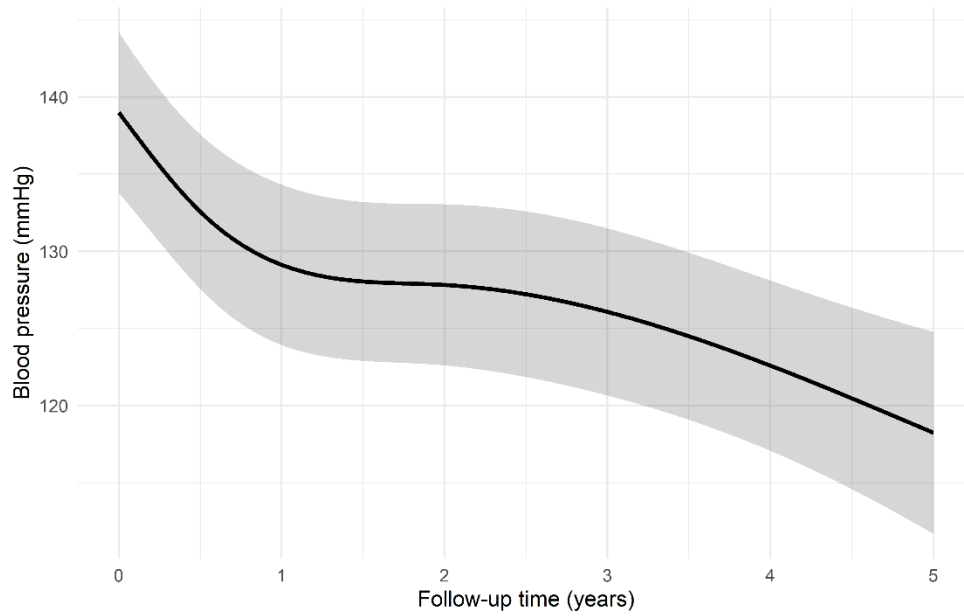

b. Ambulatory mean 24-hour diastolic blood pressure

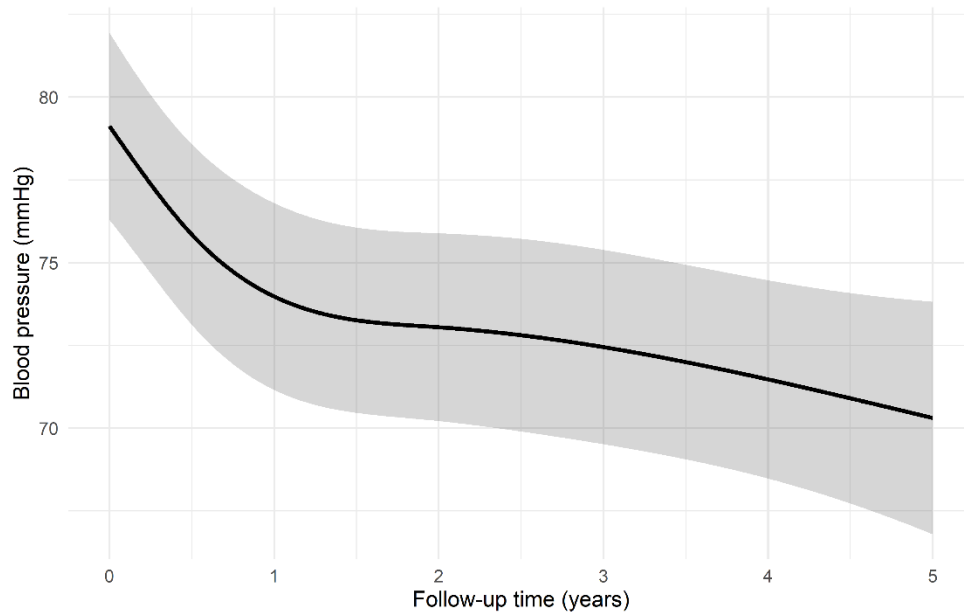

**Supplemental figure 2.** Model effect plot for changes in ambulatory nighttime (a.) systolic and (b.) diastolic blood pressure over time.

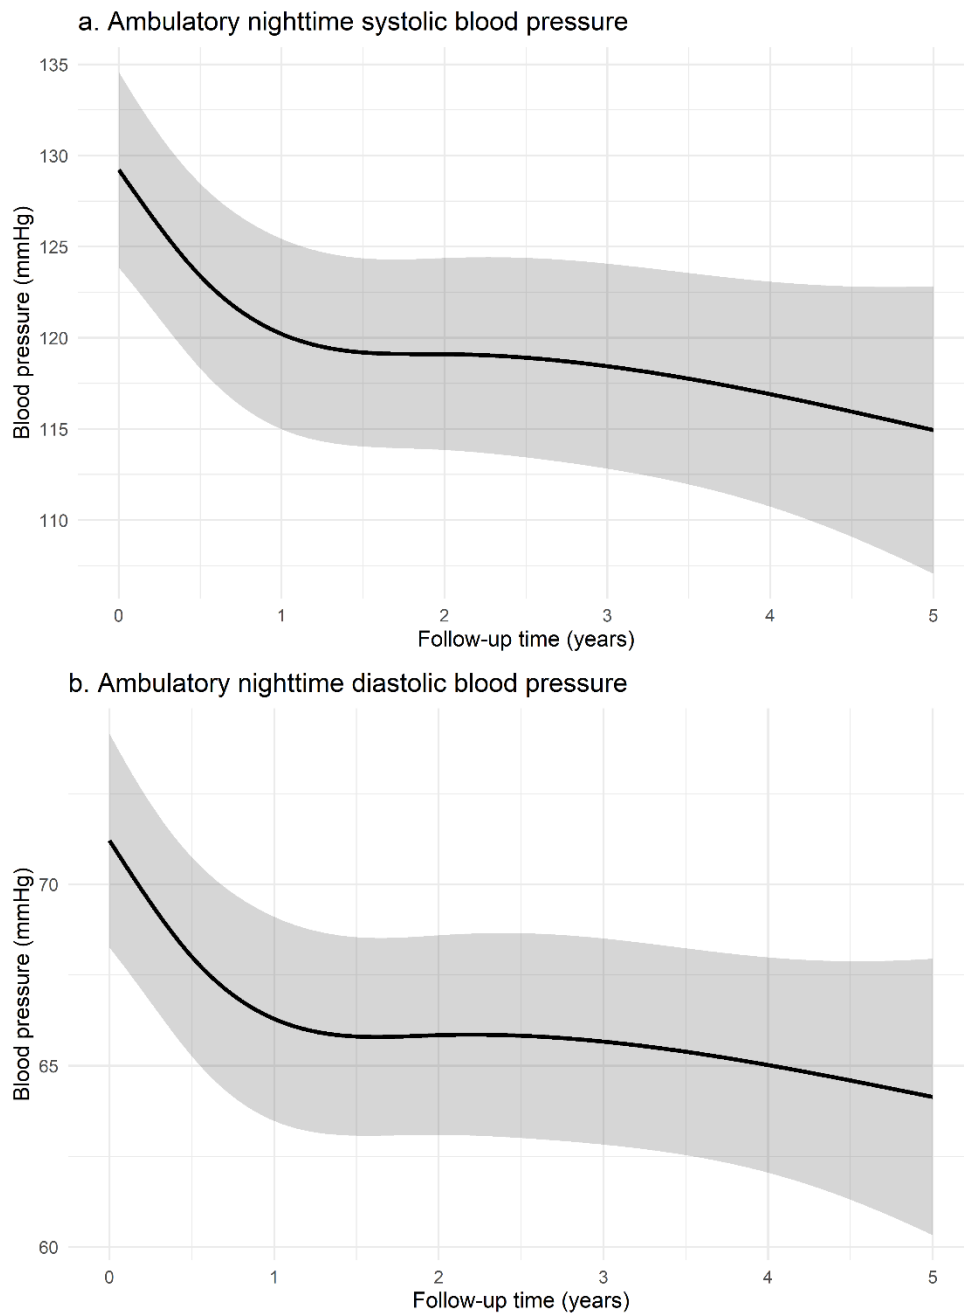

**Supplemental figure 3.** Model effect plot for changes in daytime ambulatory systolic blood pressure in a subgroup analysis for sex.

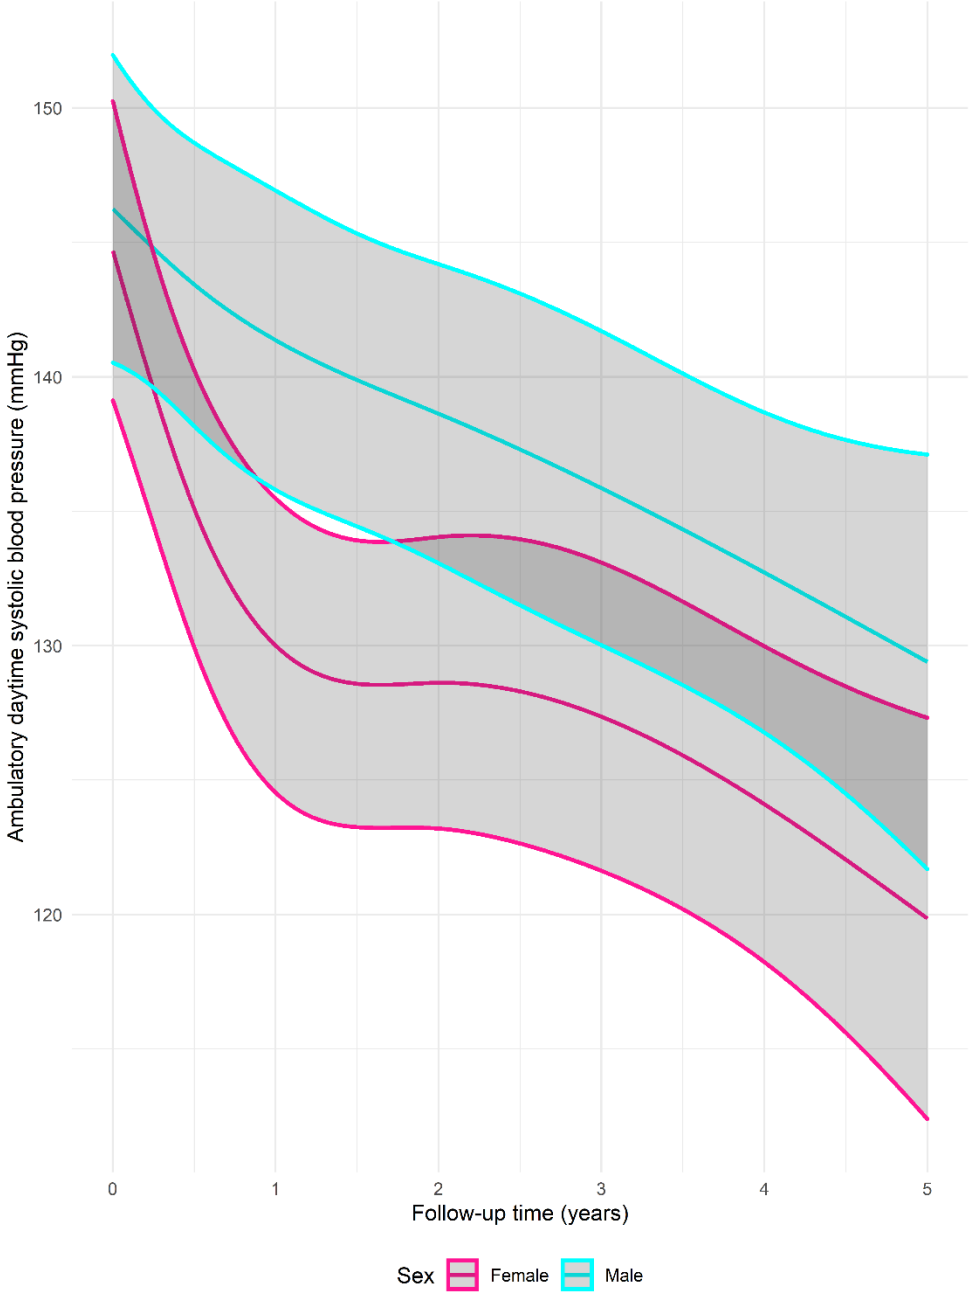

**Supplemental figure 4.** Model effect plot for changes in office heart rate over time.

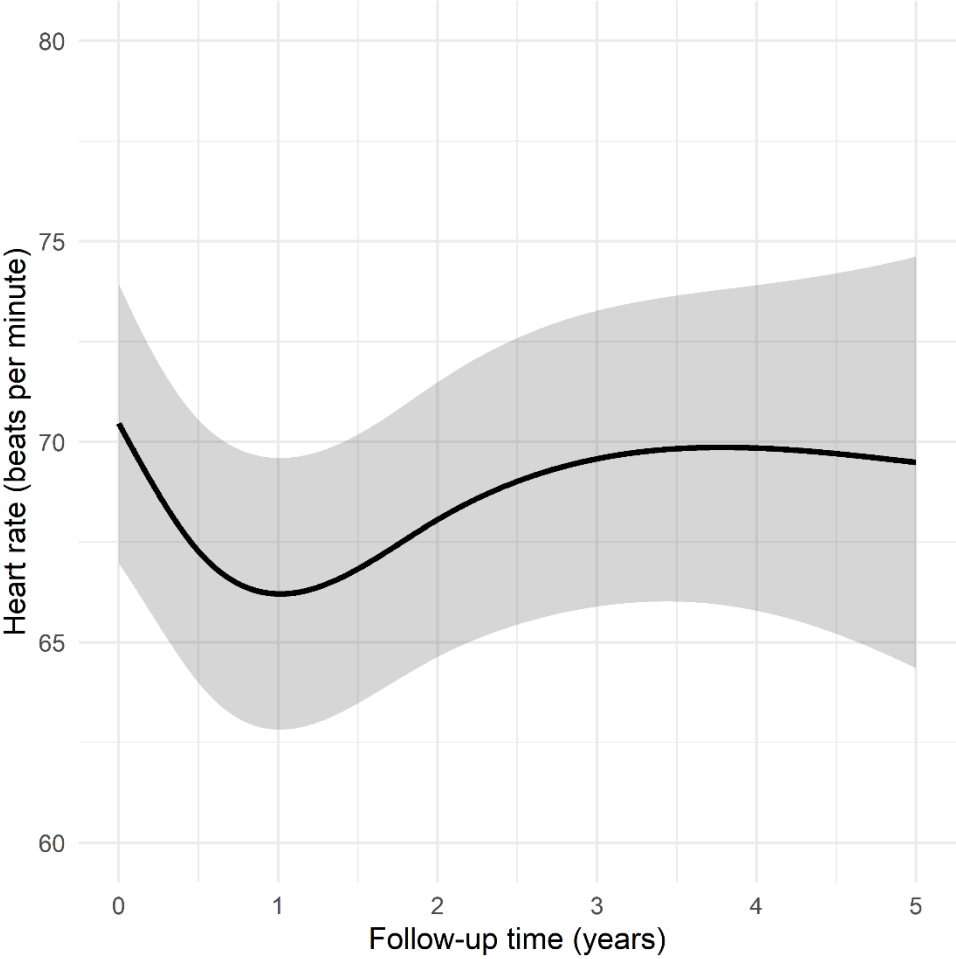

Supplement: 392_2022_2056_MOESM1_ESM.pdf [file 392_2022_2056_MOESM1_ESM.pdf]
